# Supplementary material for: Cancer-associated fibroblasts require proline synthesis by PYCR1 for the deposition of pro-tumorigenic extracellular matrix
Source: PubMed Central journal article supplement (PMC9236907; doi:10.1038/s42255-022-00582-0), 2022-06-27

Ext Fig 3a

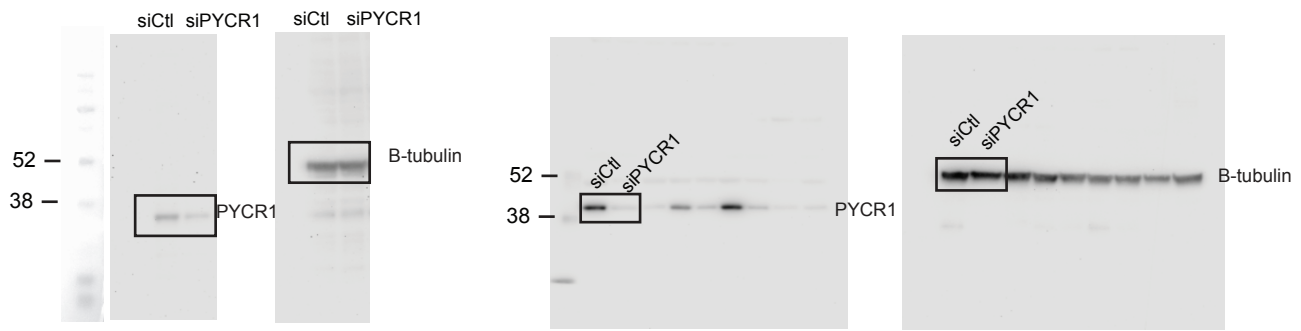

Ext Fig 3d

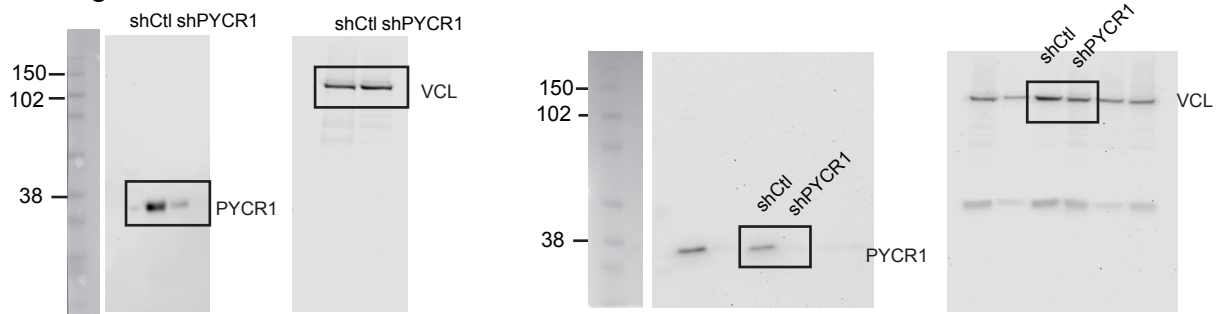

Ext Fig 3h

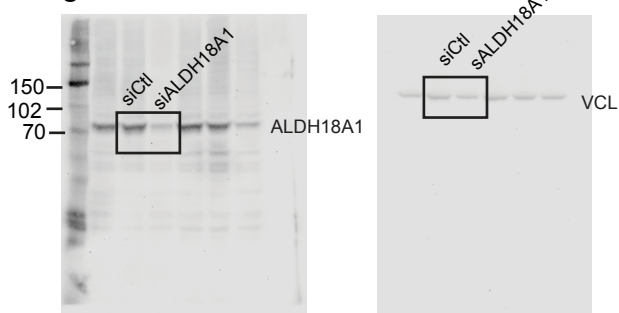

Ext Fig 3i

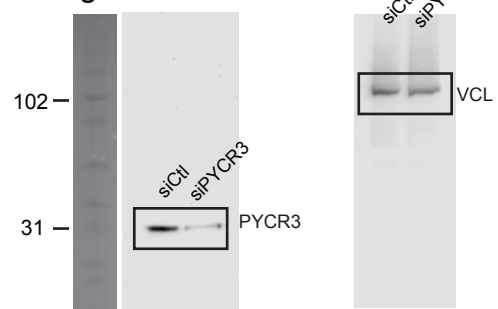

Ext Fig 3j

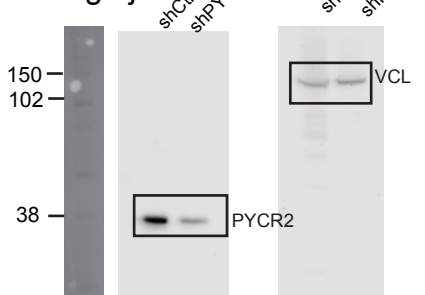

Ext Fig 3k

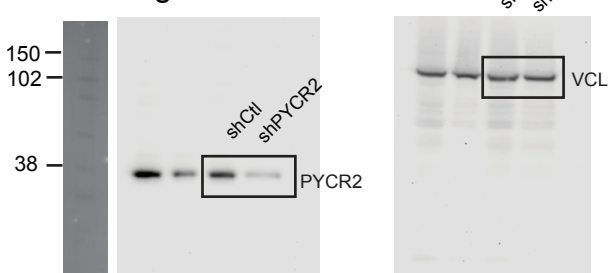

Ext Fig 3v

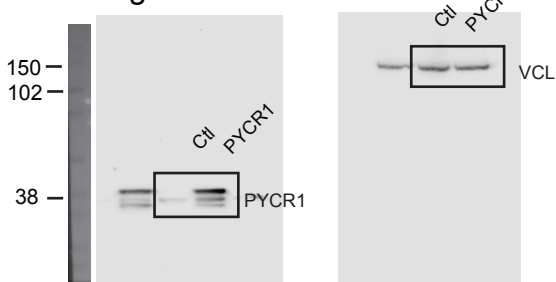

Supplement: 42255_2022_582_MOESM29_ESM.pdf [file 42255_2022_582_MOESM29_ESM.pdf]
