# Supplementary material for: Cancer-associated fibroblasts require proline synthesis by PYCR1 for the deposition of pro-tumorigenic extracellular matrix
Source: PubMed Central journal article supplement (PMC9236907; doi:10.1038/s42255-022-00582-0), 2022-06-27

# Extended Data Figure 5

## Ext Figure 5f

### Ext Figure 5e

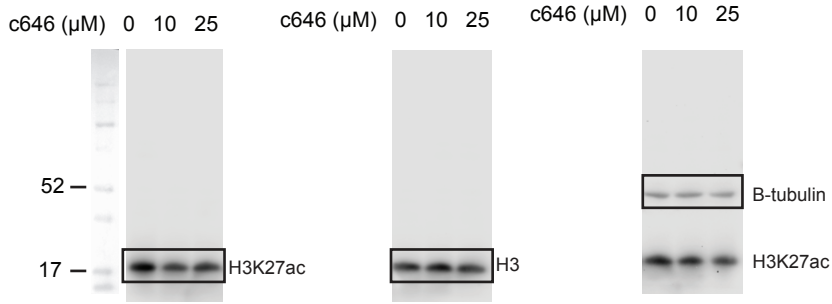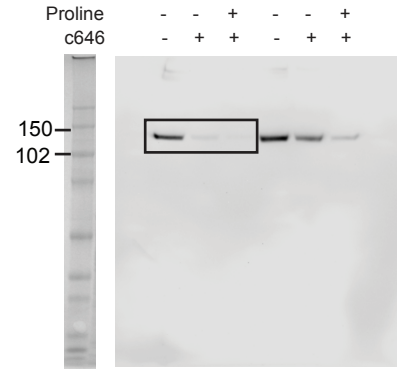

### Ext Figure 5g

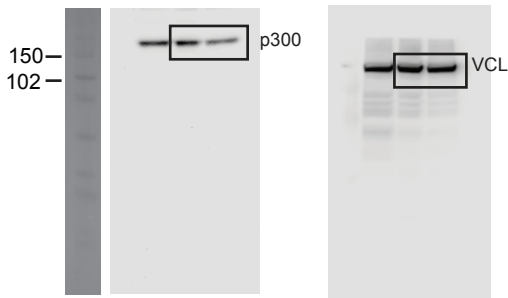

### Ext Fig 5l

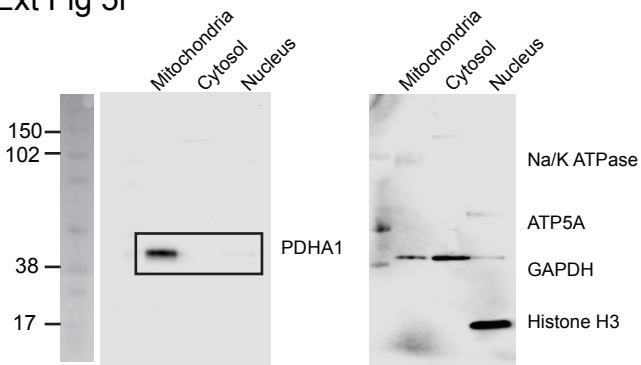

### Ext Fig 5m

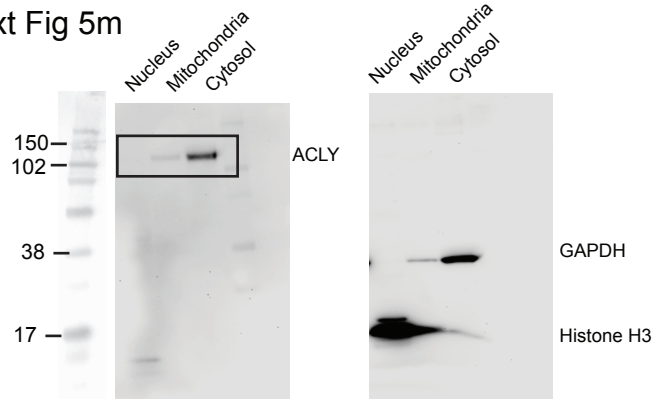

### Ext Fig 5q

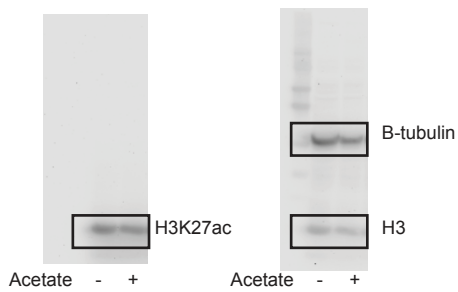

Supplement: 42255_2022_582_MOESM33_ESM.pdf [file 42255_2022_582_MOESM33_ESM.pdf]
