# Supplementary material for: Cancer-associated fibroblasts require proline synthesis by PYCR1 for the deposition of pro-tumorigenic extracellular matrix
Source: PubMed Central journal article supplement (PMC9236907; doi:10.1038/s42255-022-00582-0), 2022-06-27

# Extended Data Figure 7

## Ext Fig 7a

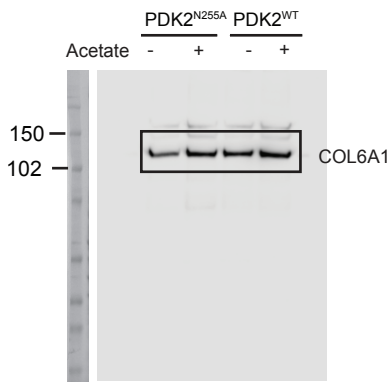

## Ext Fig 7b

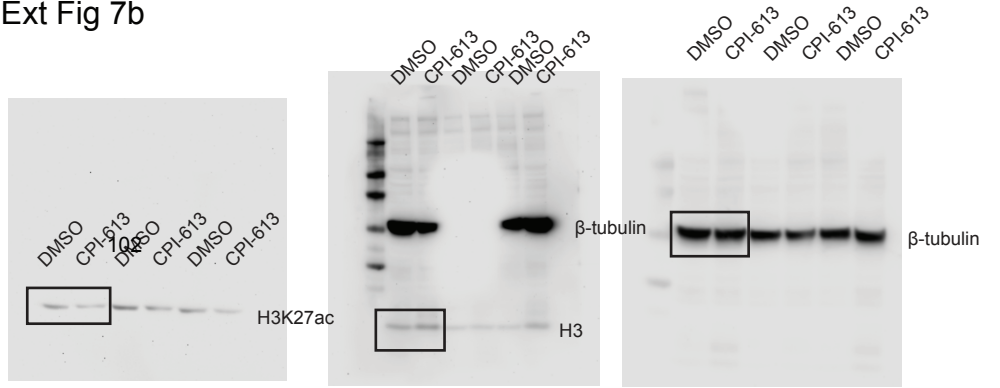

## Ext Fig 7g

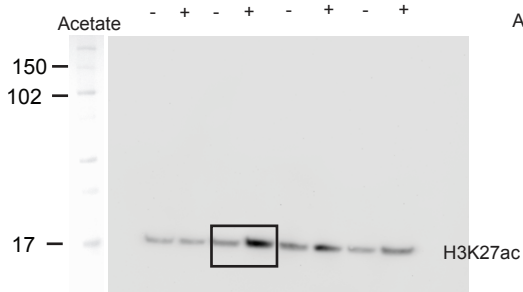

## Ext Fig 7i

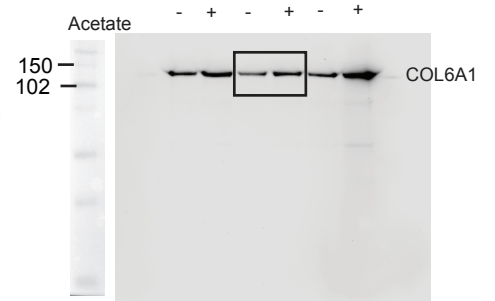

## Ext Fig 7l

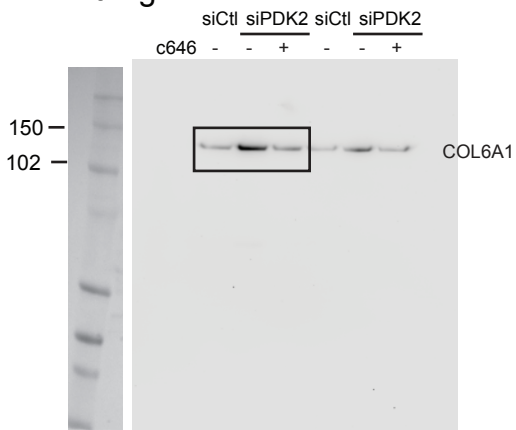

## Ext Fig 7m

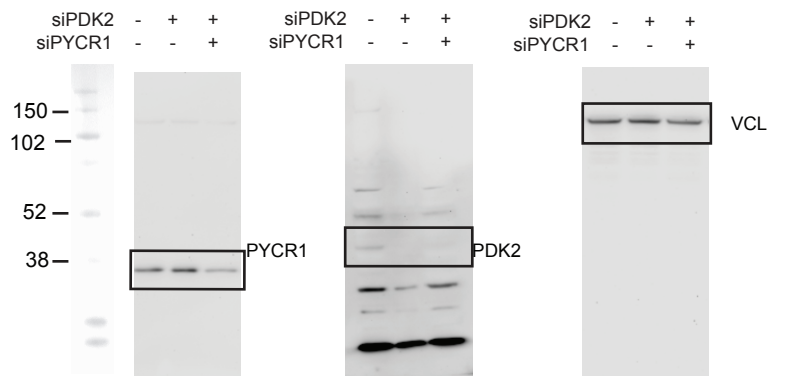

## Ext Fig 7n

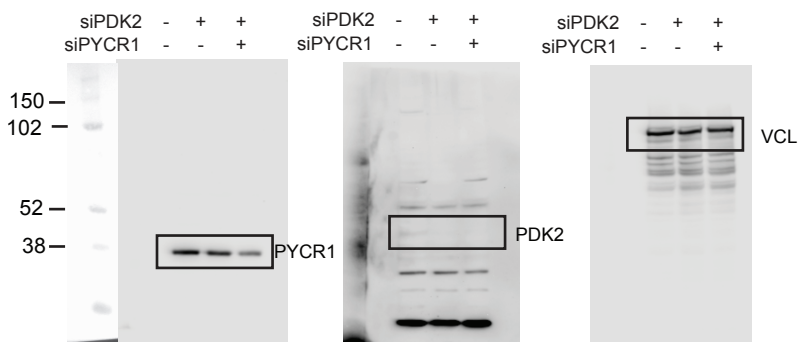

Supplement: 42255_2022_582_MOESM37_ESM.pdf [file 42255_2022_582_MOESM37_ESM.pdf]
